# Supplementary material for: Safety and immunogenicity of candidate vaccine M72/AS01E in adolescents in a TB endemic setting
Source: PubMed Central journal article supplement — Vaccine. Author manuscript; Available in PMC 2018 Mar 12. (PMC5845829; doi:10.1016/j.vaccine.2015.05.088), 2015-06-10
Supplement: NIHMS947072-supplement-Supplemental_Figure_1.pdf [file NIHMS947072-supplement-Supplemental_Figure_1.pdf]

**Assessed for eligibility**  
(n=79)

**Excluded** (n=19)

- Not meeting inclusion criteria (n=14)
- Declined to participate (n=5)
- Other reasons (n=0)

**Randomised** (n=60)

**M72/AS01<sub>E</sub>** (n=40)

- Received allocated intervention (n=40)
- Did not receive allocated intervention (n=0)

**Saline Placebo** (n=20)

- Received allocated intervention (n=20)
- Did not receive allocated intervention (n=0)

- Loss to follow up (n=0)
- Discontinued intervention (n=0)

- Loss to follow up (n=0)
- Discontinued intervention (n=0)

**Safety Analysis**

- Analysed (n=40)
- Excluded from analysis (n=0)

**Safety Analysis**

- Analysed (n=20)
- Excluded from analysis (n=0)

**Immunogenicity Analysis**

- Analysed according-to-protocol (n=39)
- Excluded (n=1)
  - Reason for exclusion: Non-compliance with blood sampling time windows

**Immunogenicity Analysis**

- Analysed according-to-protocol (n=20)
- Excluded (n=0)

Allocation

Follow-up

Analysis
