# Supplementary figures and images for: Safety and immunogenicity of candidate vaccine M72/AS01E in adolescents in a TB endemic setting
Source: PubMed Central journal article supplement — Vaccine. Author manuscript; Available in PMC 2018 Mar 12. (PMC5845829; doi:10.1016/j.vaccine.2015.05.088), 2015-06-10

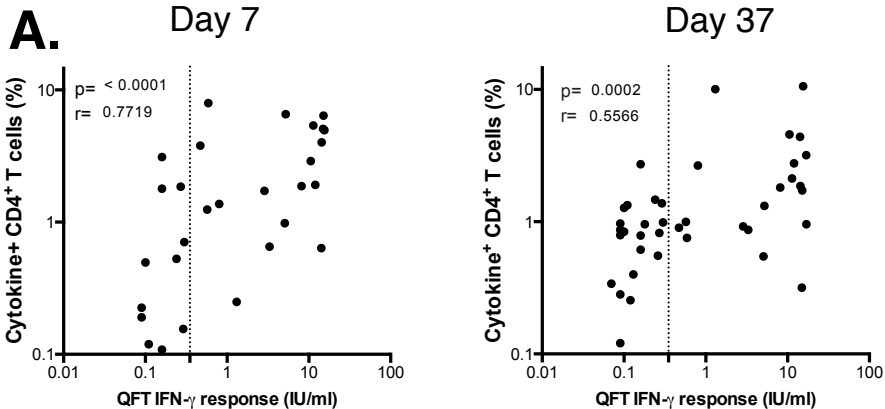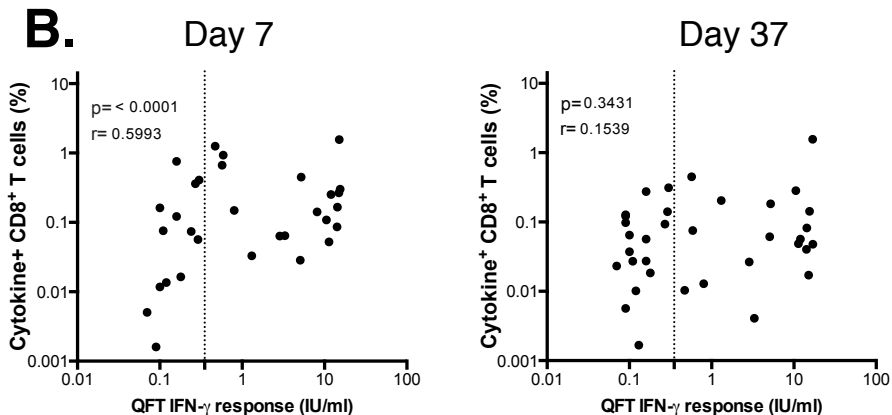

Supplement: NIHMS947072-supplement-Supplemenal_Figure_6.pdf [file NIHMS947072-supplement-Supplemenal_Figure_6.pdf]

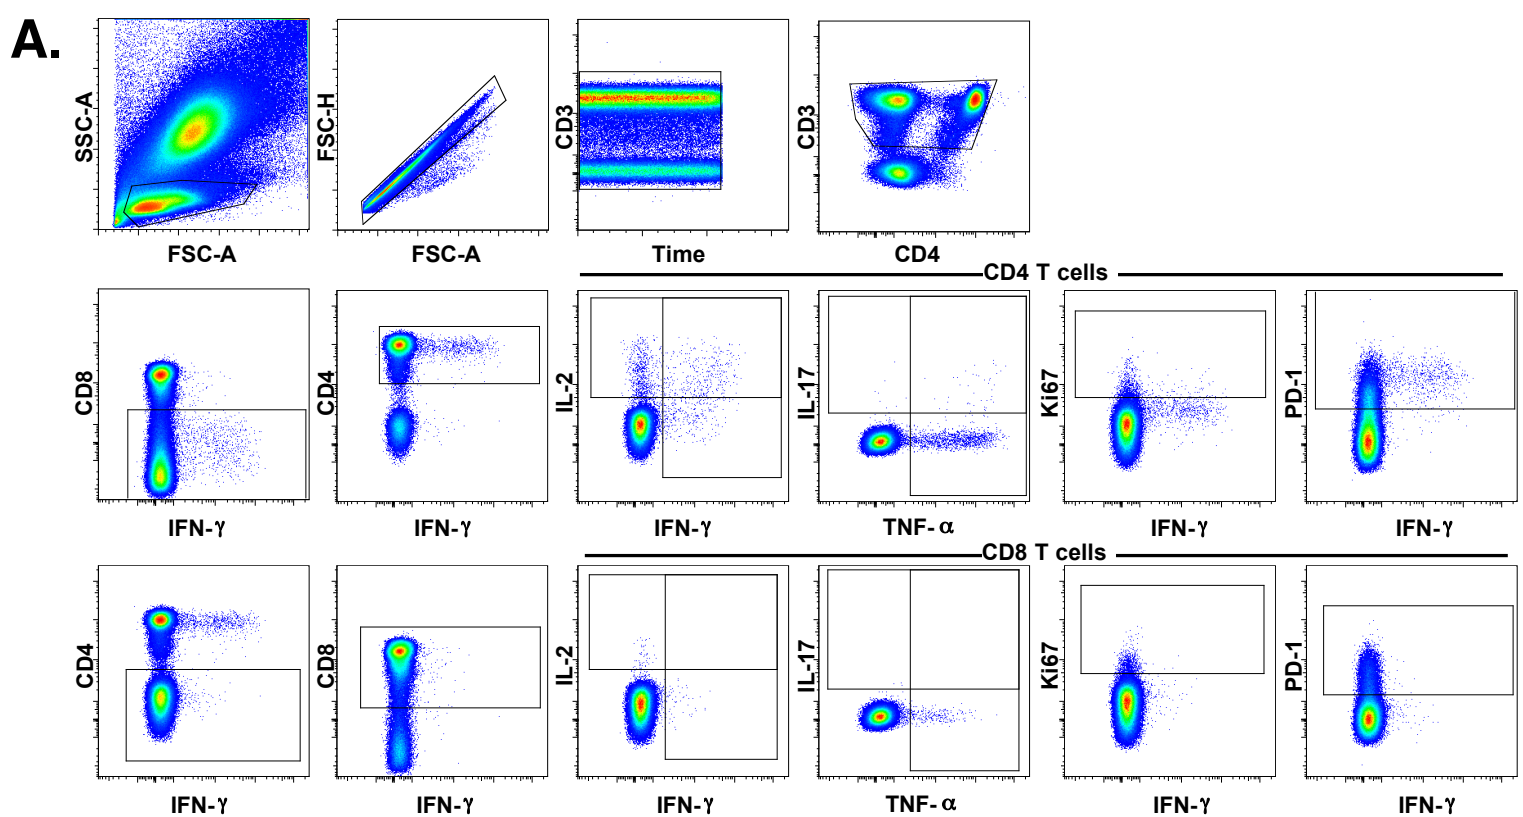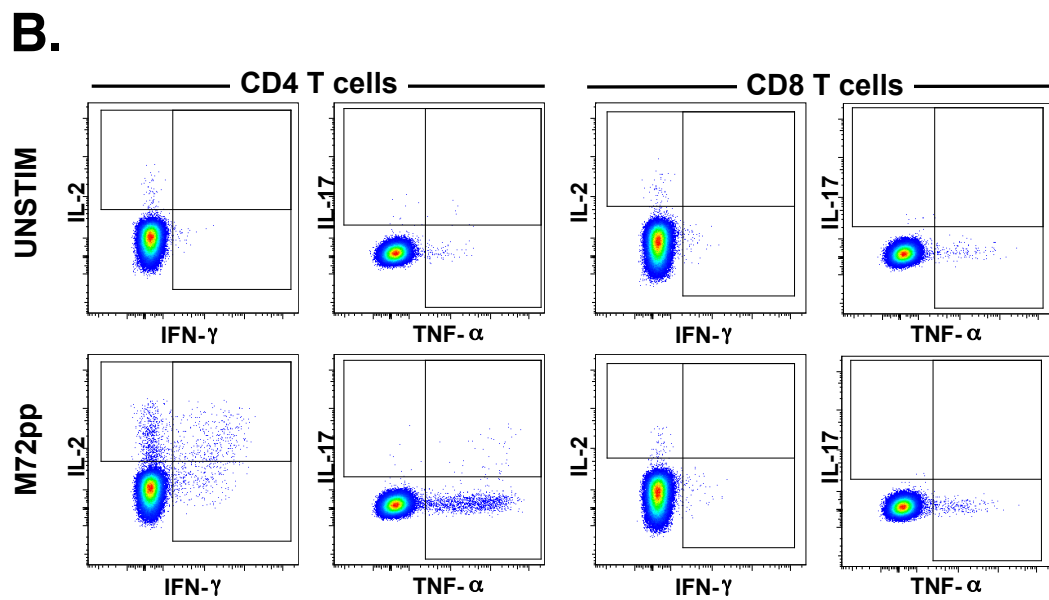

Supplement: NIHMS947072-supplement-Supplemental_Figure_2.pdf [file NIHMS947072-supplement-Supplemental_Figure_2.pdf]

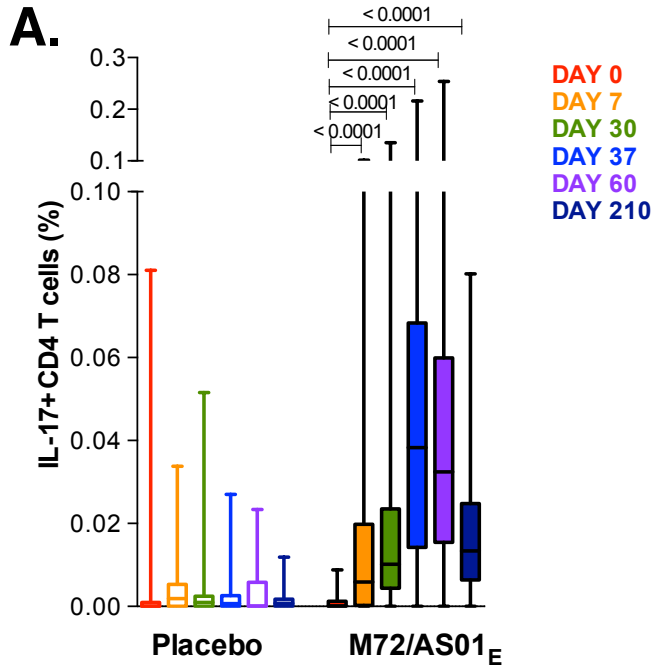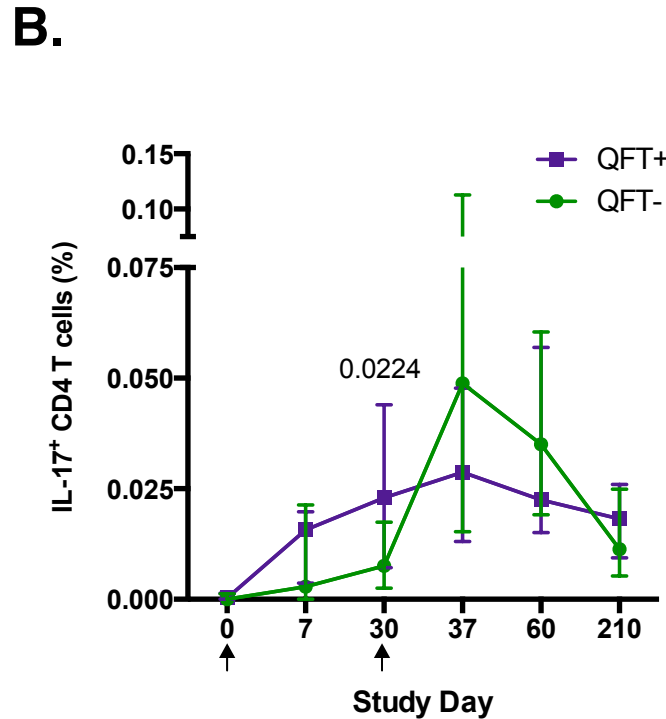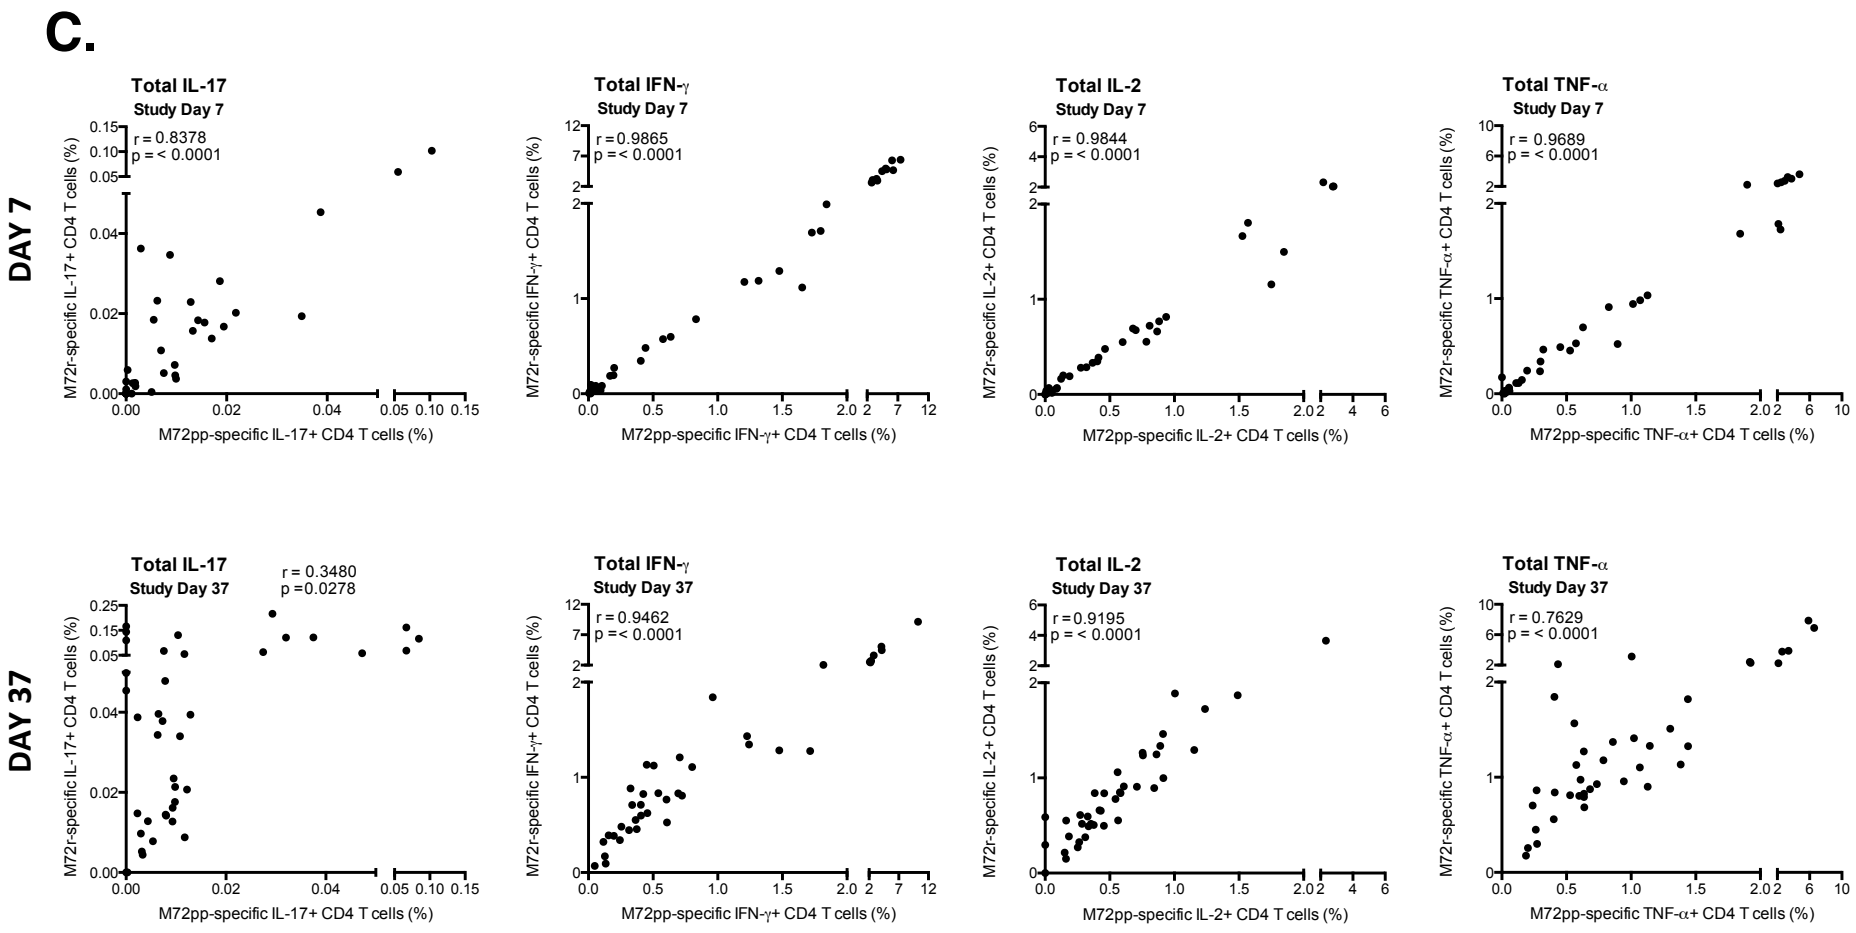

Supplement: NIHMS947072-supplement-Supplemental_Figure_3.pdf [file NIHMS947072-supplement-Supplemental_Figure_3.pdf]

**A.**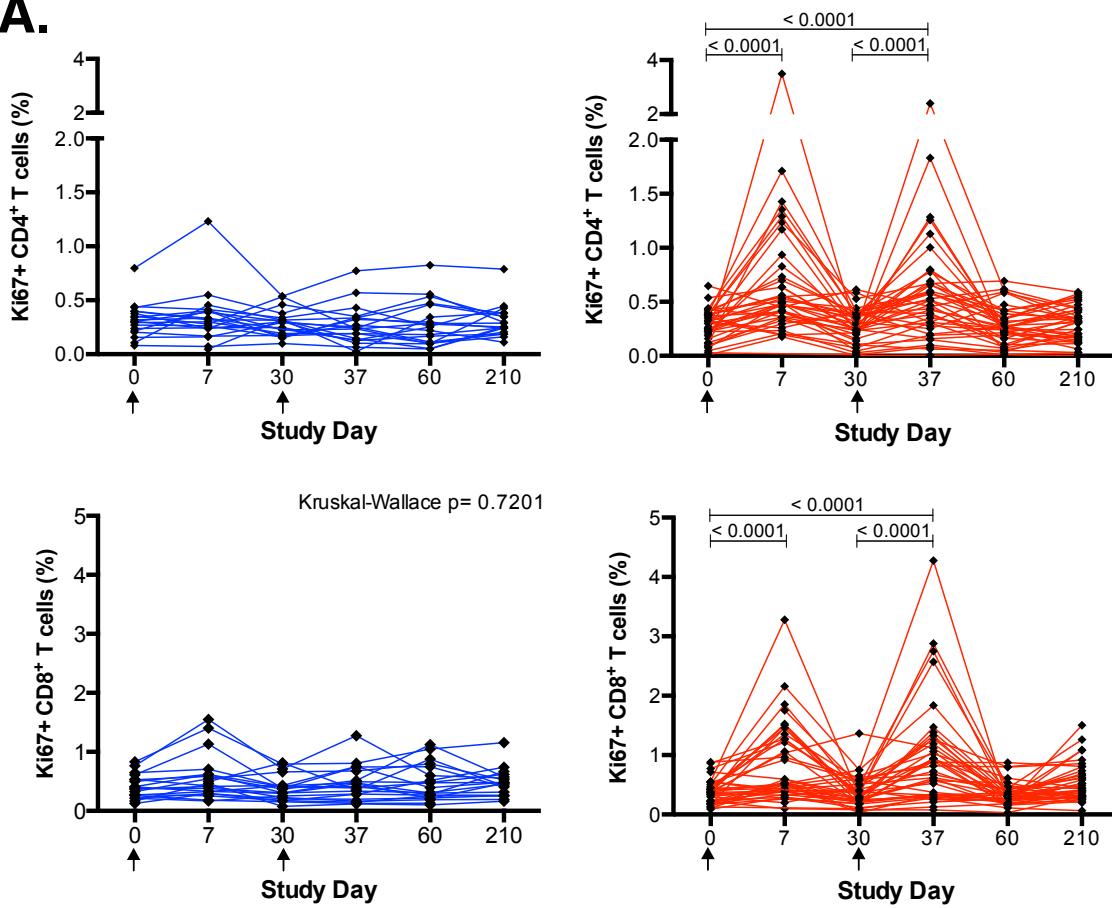**B.**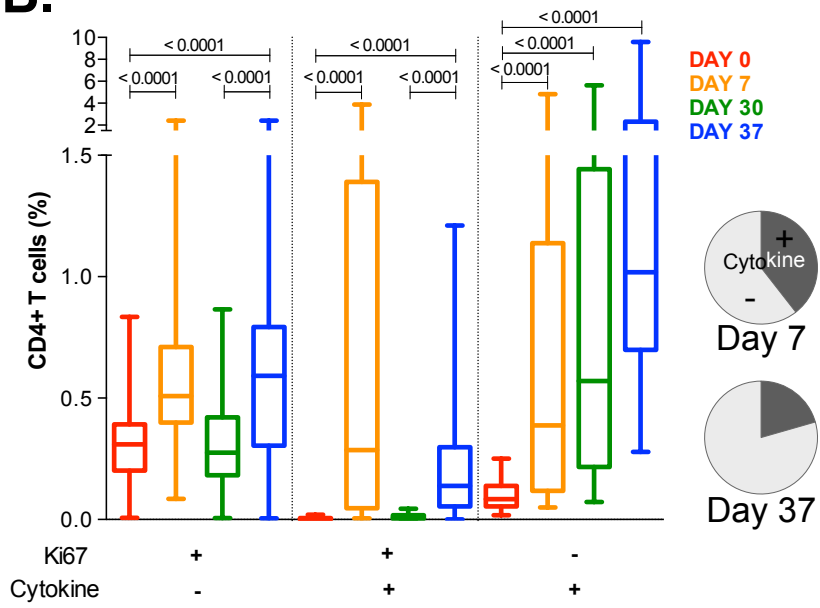**C.**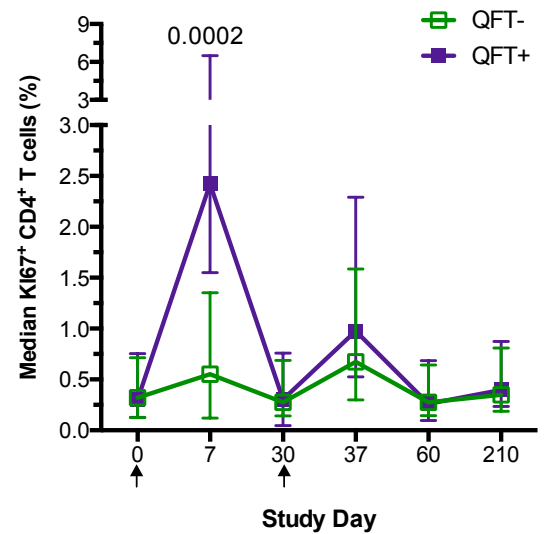**D.**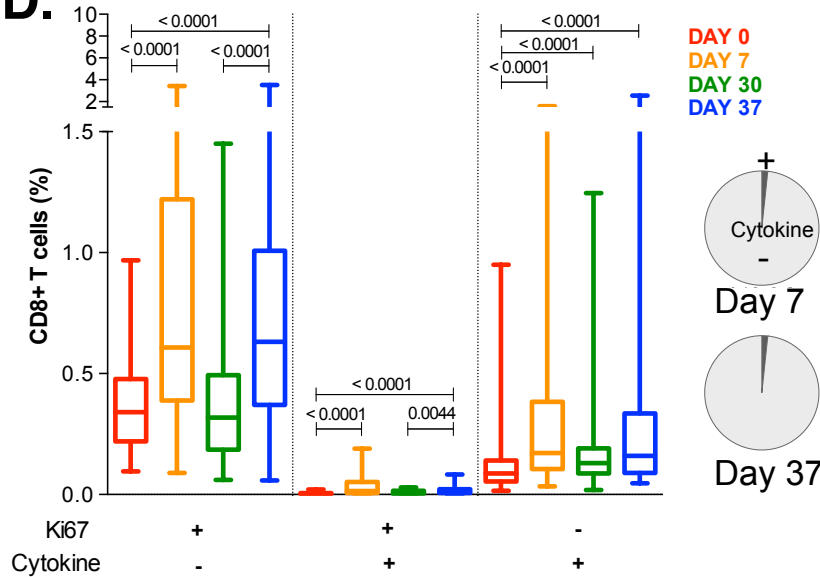**E.**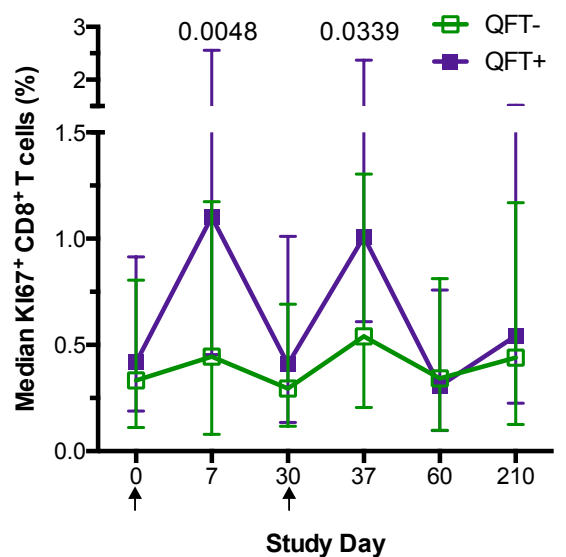

Supplement: NIHMS947072-supplement-Supplemental_Figure_4.pdf [file NIHMS947072-supplement-Supplemental_Figure_4.pdf]

**A.**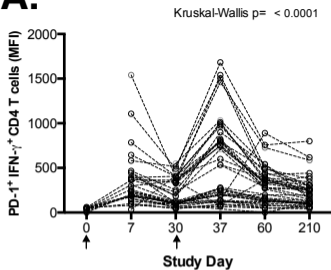**B.**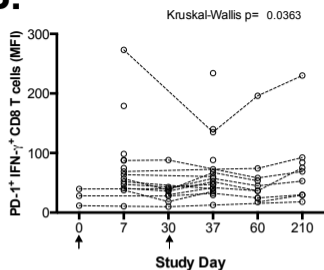**C.**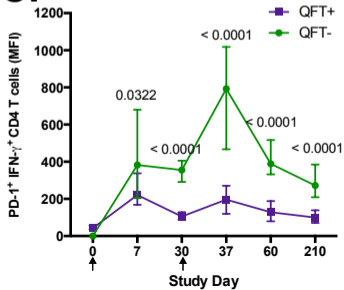**D.**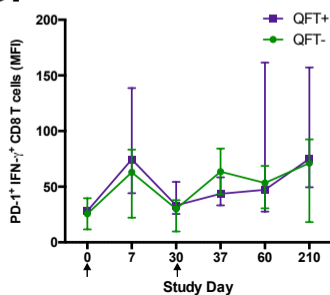

Supplement: NIHMS947072-supplement-Supplemental_Figure_5.pdf [file NIHMS947072-supplement-Supplemental_Figure_5.pdf]
